# Supplementary material for: Concentration gradient-controlled growth of large-grain CH3NH3PbI3films and enhanced photovoltaic performance of solar cells under ambient conditions
Source: Royal Society of Chemistry journal article supplement (doi:10.1039/c6ce02151d), 2016-01-01
Supplement: c6ce02151d1.pdf [file c6ce02151d1.pdf]

## Supplementary Materials for

# Concentration gradient controlled growth of large-grain $\text{CH}_3\text{NH}_3\text{PbI}_3$ films and enhanced photovoltaic performance of solar cells in ambient conditions

Chunfeng Lan<sup>1</sup>, Shuai Zhao<sup>1</sup>, Chu Zhang<sup>1</sup>, Weiguo Liu<sup>1</sup>, Shuzi Hayase<sup>1</sup>, Tingli Ma<sup>\*1,2</sup>

<sup>1</sup>Graduate School of Life Science and Systems Engineering, Kyushu Institute of Technology, Wakamatsu, Kitakyushu, 808–0196, Japan

<sup>2</sup>School of Petroleum and Chemical Engineering, Dalian University of Technology, Panjin Campus, Panjin 124221, P. R. China

\*Author to whom correspondence should be addressed. E-mail: [tinglima@life.kyutech.ac.jp](mailto:tinglima@life.kyutech.ac.jp)

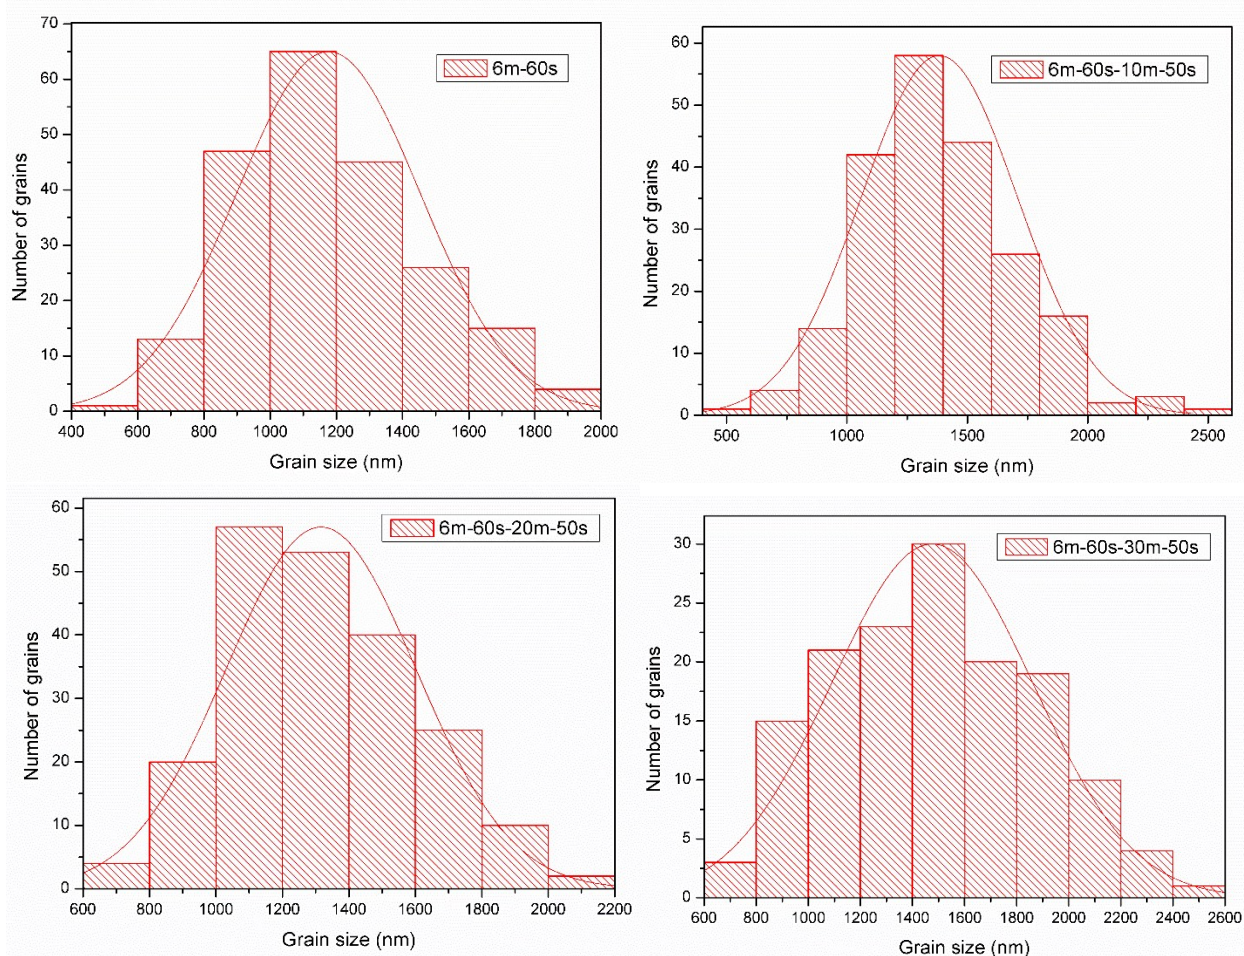



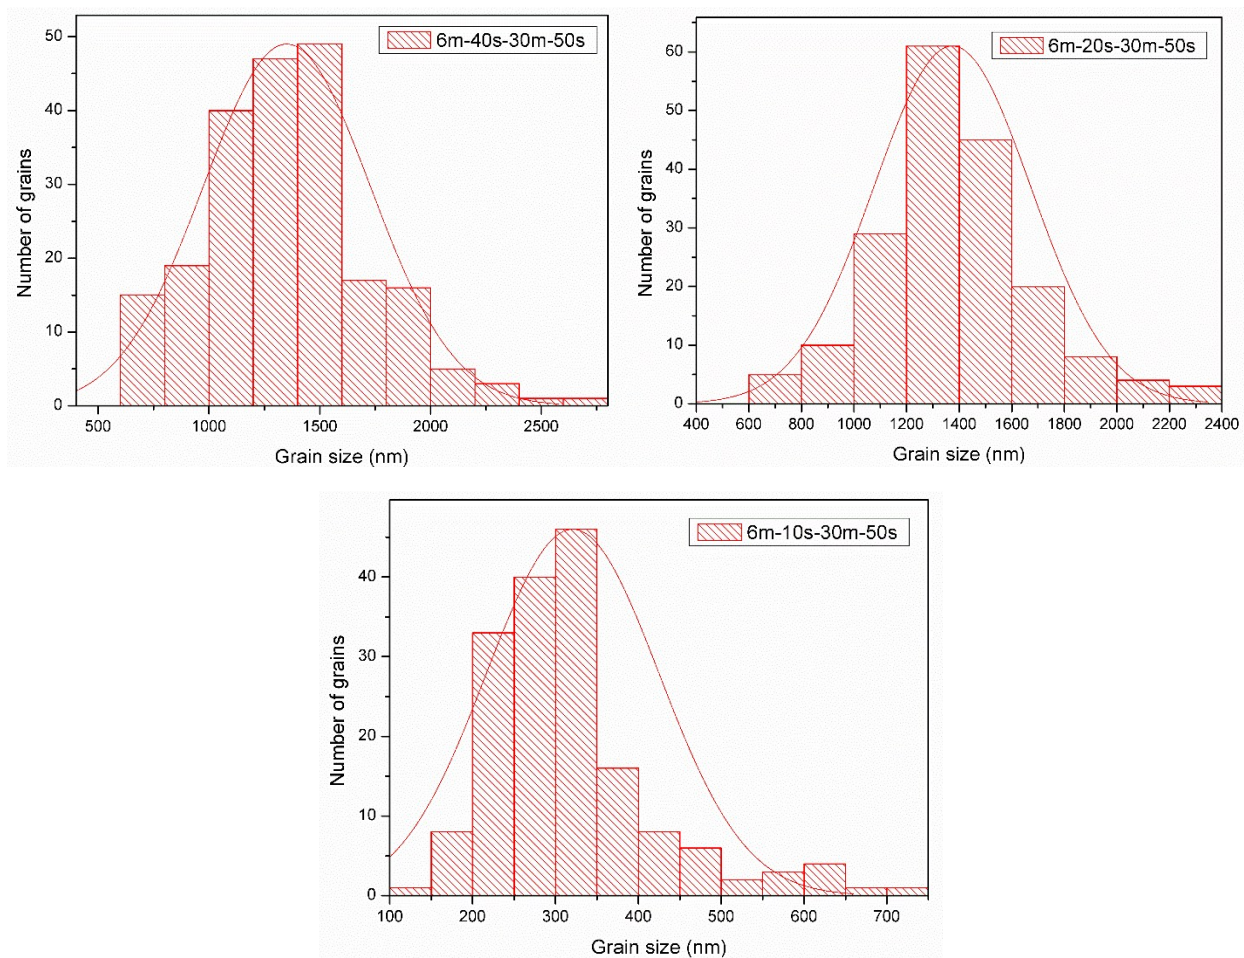

Fig. S1. Histogram of the grain sizes of the perovskite films

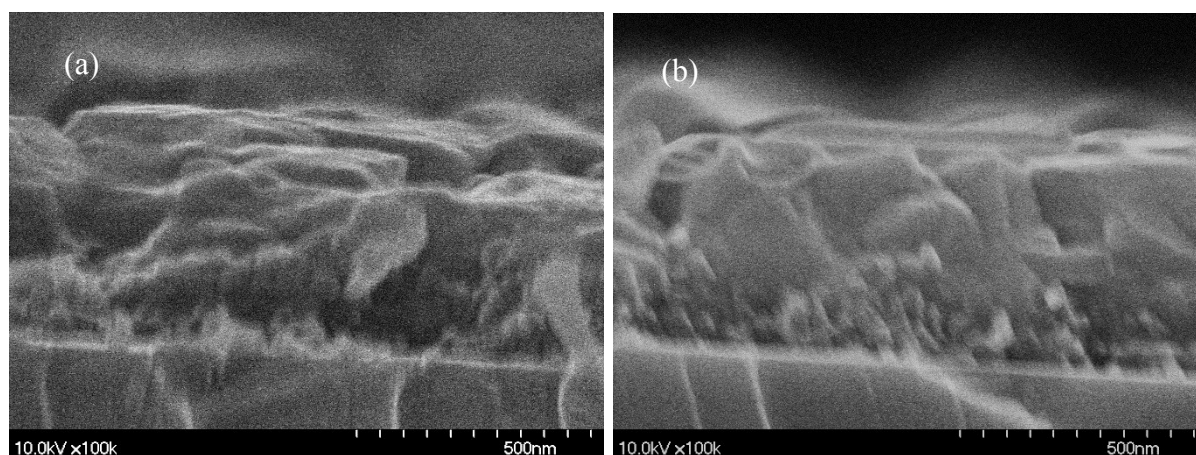

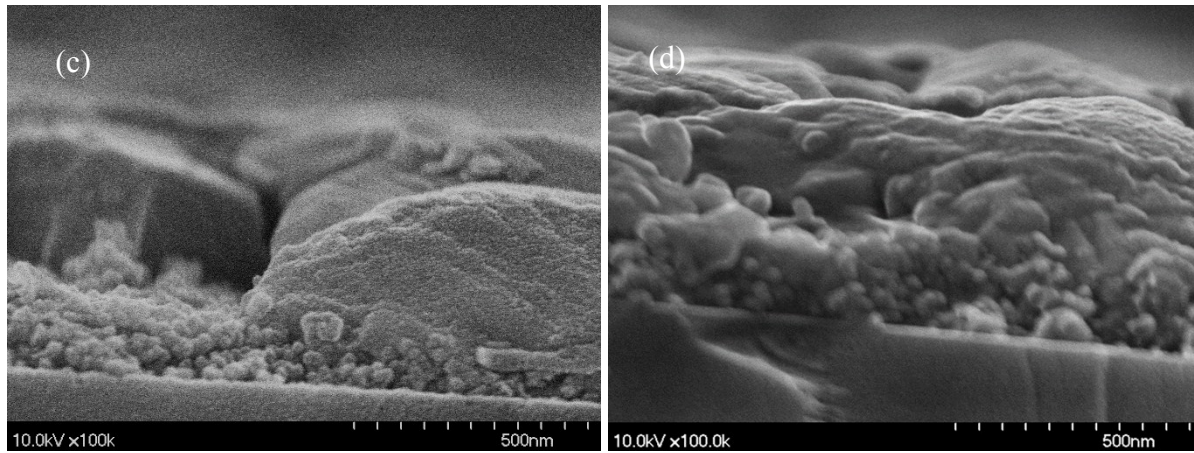

Fig. S2. Cross-section SEM images of the sample. a) 6m-60s, b) 6m-10s-30m-50s, c) 6m-60s-10m-50s, d) 6m-60s-30m-50s.

Tab. S1. Statistic analysis on the grain size distribution of the perovskite films.

|                | Max./nm | Min./nm | Mean/nm |
|----------------|---------|---------|---------|
| 6m-60s         | 1980.21 | 585.44  | 1171.23 |
| 6m-60s-10m-50s | 2438.82 | 594.53  | 1377.54 |
| 6m-60s-20m-50s | 2057.82 | 617.07  | 1315.23 |
| 6m-60s-30m-50s | 2461.41 | 713.67  | 1467.93 |
| 6m-10s-30m-50s | 728.63  | 137.89  | 313.72  |
| 6m-20s-30m-50s | 2359.29 | 617.39  | 1367.48 |
| 6m-40s-30m-50s | 2607.01 | 607.13  | 1339.04 |

Tab. S2. List of  $I$ - $V$  information of the solar devices (MAI concentration effect)

|                | $J_{sc}$ (mA/cm <sup>2</sup> ) | $V_{oc}$ (V) | FF   | PCE (%) |
|----------------|--------------------------------|--------------|------|---------|
| 6m-60s         |                                |              |      |         |
|                | 9.90                           | 0.87         | 0.61 | 5.25    |
|                | 10.63                          | 0.80         | 0.46 | 3.96    |
| 6m-60s-10m-50s |                                |              |      |         |
|                | 12.52                          | 0.91         | 0.58 | 6.59    |
|                | 13.93                          | 0.89         | 0.53 | 6.50    |

|                |       |      |      |       |
|----------------|-------|------|------|-------|
| 6m-60s-20m-50s | 13.85 | 0.89 | 0.61 | 7.52  |
|                | 15.88 | 0.91 | 0.59 | 8.56  |
|                | 16.79 | 0.91 | 0.62 | 9.57  |
|                | 17.60 | 0.91 | 0.62 | 9.92  |
| 6m-60s-30m-50s | 18.09 | 0.98 | 0.65 | 11.48 |
|                | 17.89 | 0.98 | 0.62 | 10.92 |
|                | 17.48 | 0.97 | 0.64 | 10.81 |
|                |       |      |      |       |

Tab. S3. List of  $I$ - $V$  information of the solar devices (MAI loading time effect)

|                | $J_{sc}$ (mA/cm <sup>2</sup> ) | $V_{oc}$ (V) | FF   | $PCE$ (%) |
|----------------|--------------------------------|--------------|------|-----------|
| 6m-60s         | 9.90                           | 0.87         | 0.61 | 5.25      |
|                | 10.63                          | 0.80         | 0.46 | 3.96      |
|                |                                |              |      |           |
| 6m-10s-30m-50s | 13.10                          | 0.90         | 0.60 | 7.02      |
|                | 11.81                          | 1.00         | 0.67 | 7.93      |
|                | 15.49                          | 0.92         | 0.55 | 7.91      |
|                | 14.87                          | 0.94         | 0.68 | 9.53      |
|                |                                |              |      |           |
| 6m-20s-30m-50s | 11.07                          | 0.97         | 0.62 | 6.61      |
|                | 15.87                          | 0.93         | 0.49 | 7.29      |
|                | 13.18                          | 0.94         | 0.70 | 8.60      |
|                | 14.53                          | 0.89         | 0.53 | 6.81      |
|                |                                |              |      |           |
| 6m-40s-30m-50s | 15.07                          | 0.92         | 0.63 | 8.77      |
|                | 17.87                          | 0.93         | 0.63 | 10.47     |
|                | 17.54                          | 0.93         | 0.63 | 10.30     |
|                |                                |              |      |           |

6m-60s-30m-50s

|       |      |      |       |
|-------|------|------|-------|
| 18.09 | 0.98 | 0.65 | 11.48 |
| 17.89 | 0.98 | 0.62 | 10.92 |
| 17.48 | 0.97 | 0.64 | 10.81 |

---
